# Supplementary material for: Polysaccharides from natural Cordyceps sinensis attenuated dextran sodium sulfate-induced colitis in C57BL/6J mice
Source: Royal Society of Chemistry journal article supplement (doi:10.1039/d2fo02555h), 2023-01-01

### Supplementary materials

The order of samples: NC, MC, NCSP-50L, NCSP-50M, NCSP-50H, NCSP and 5-ASA.

NF- $\kappa$ B p65

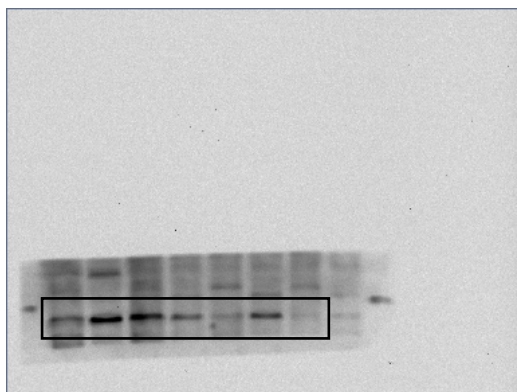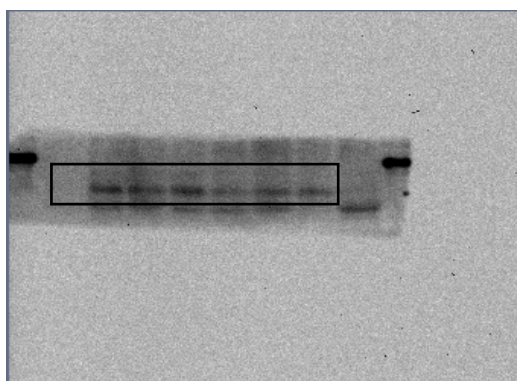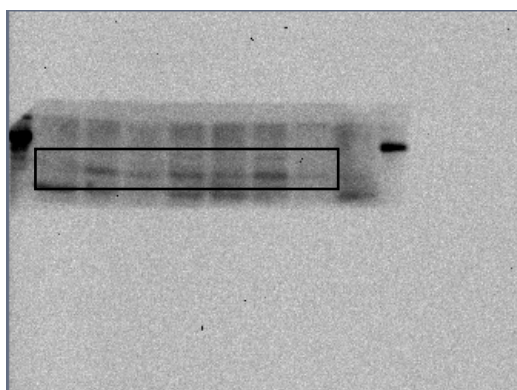

Tublin

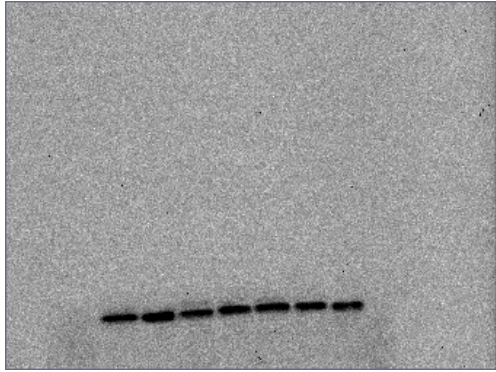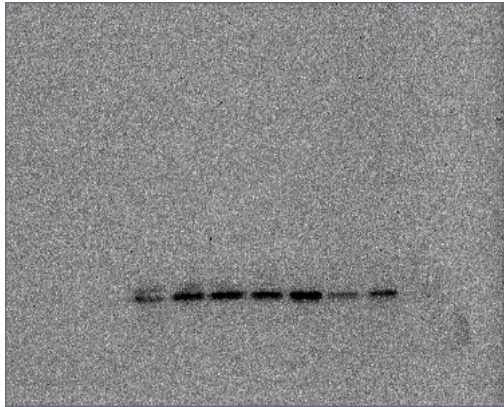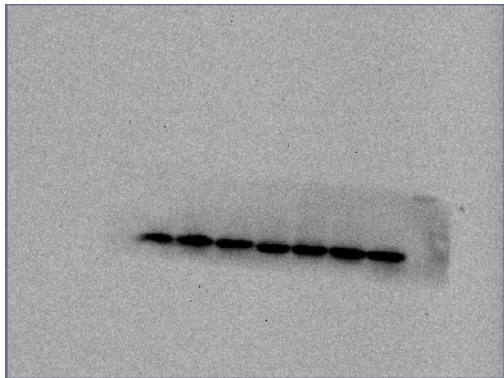

*p*-IκBα

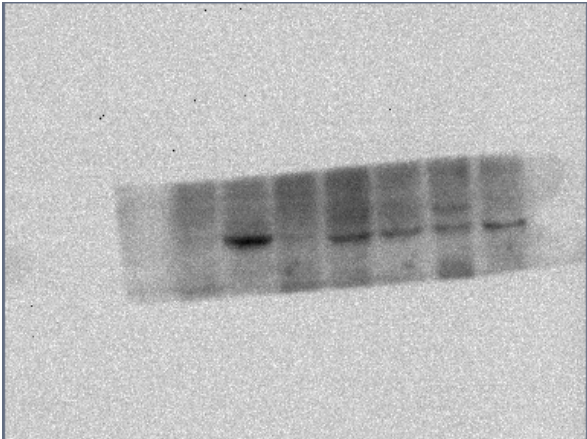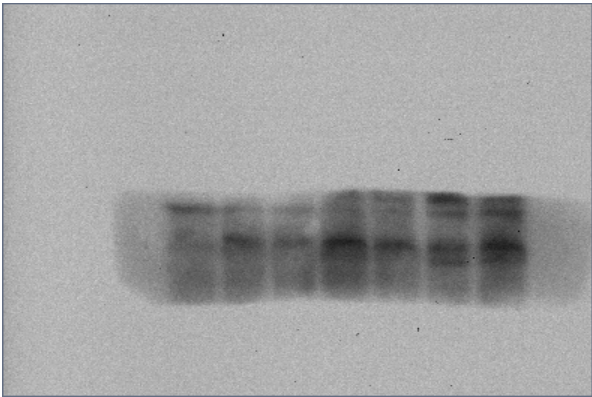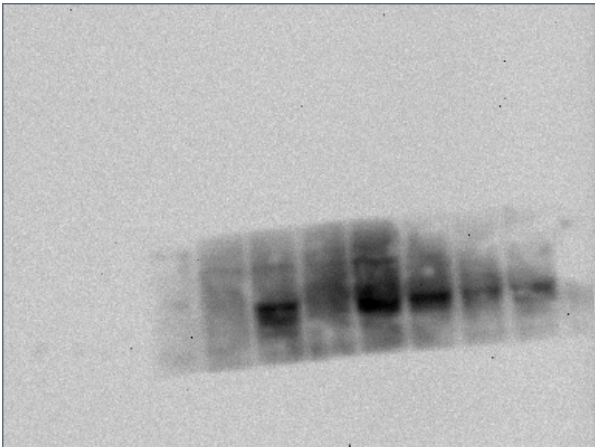

$\beta$ -actin

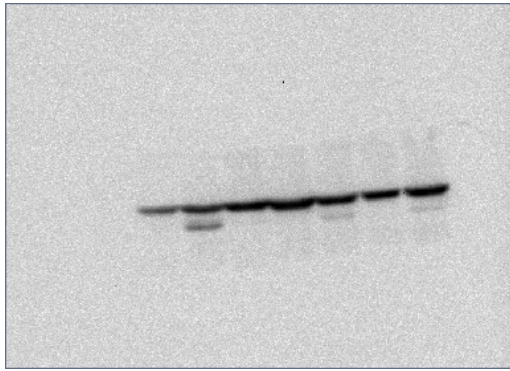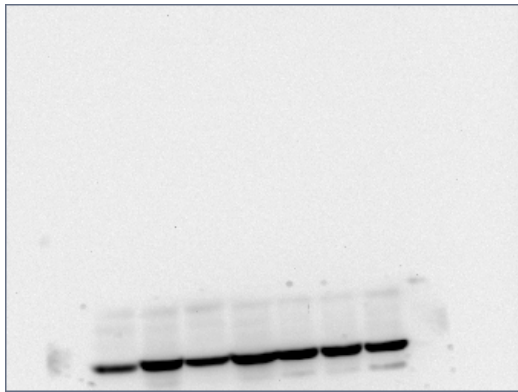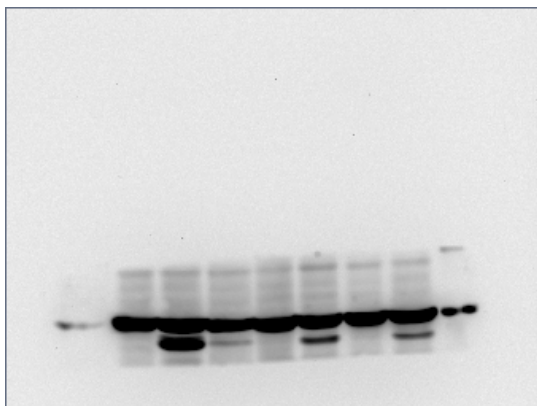

Claudin-1

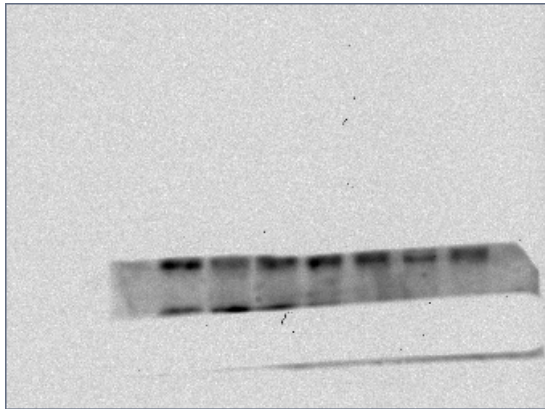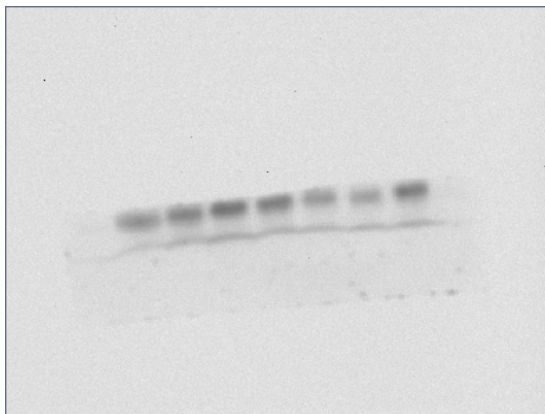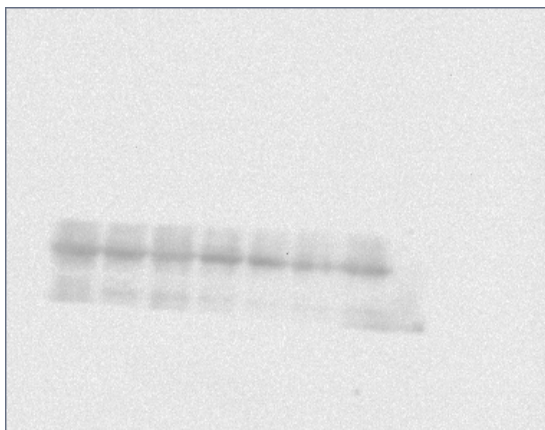



Occludin

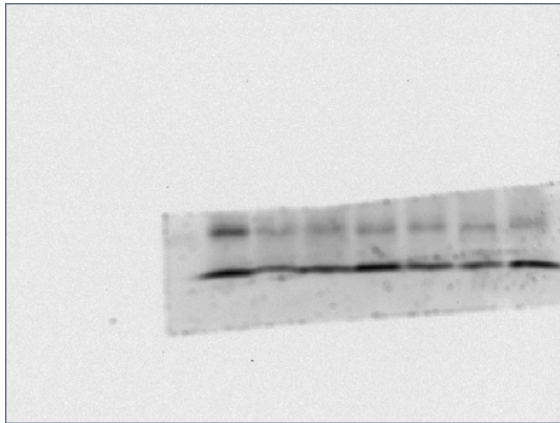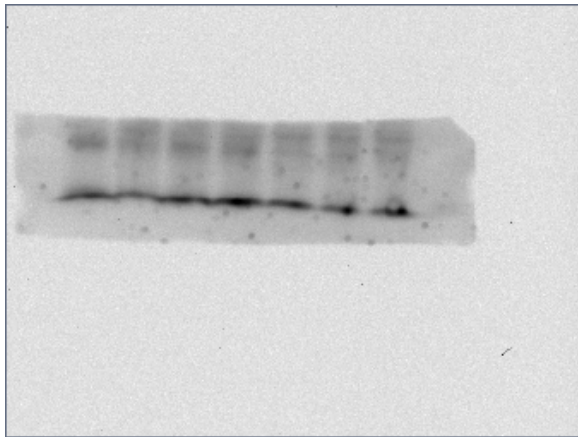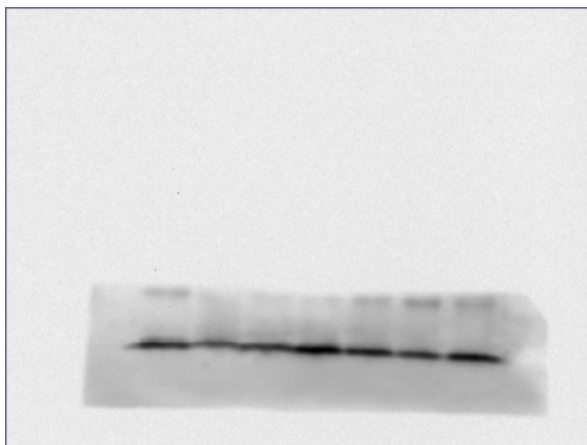

Supplement: d2fo02555h1.pdf [file d2fo02555h1.pdf]
